# Supplementary material for: A stalled retrotranslocation complex reveals physical linkage between substrate recognition and proteasomal degradation during ER-associated degradation
Source: PubMed Central journal article supplement — Mol Biol Cell. 2013 Jun 1;24(11):1765–75. doi: 10.1091/mbc.E12-12-0907 (PMC3667728; doi:10.1091/mbc.e12-12-0907), 2013-06-01
Supplement: supp_E12-12-0907v1_CombinedSupMats.pdf [file supp_E12-12-0907v1_CombinedSupMats.pdf]

# Figure. S1

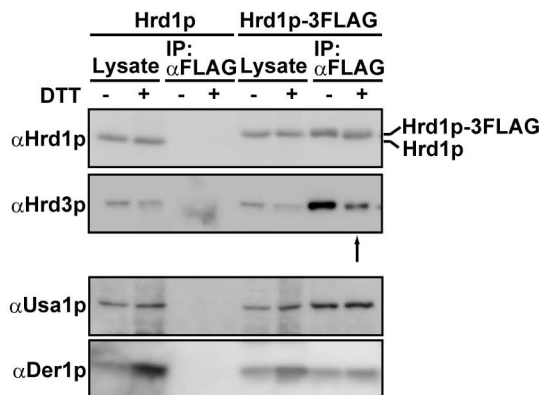

## Figure. S1 Hrd3p inefficiently binds to Hrd1p upon treatment of cells with DTT

Membrane fractions were prepared from KNY140 (*HRD1*) and KNY220 (*HRD1-3FLAG*) cells that were treated with 5 mM DTT for 1 hr. Membranes were solubilized with 1% digitonin and Hrd1p-3FLAG was immunoprecipitated with anti-FLAG antibody. The immunoprecipitates were analyzed by western blotting with the indicated antibodies. The arrow indicates that a reduced amount of Hrd3p co-precipitated with Hrd1p when cells were treated with DTT.

## Figure. S2

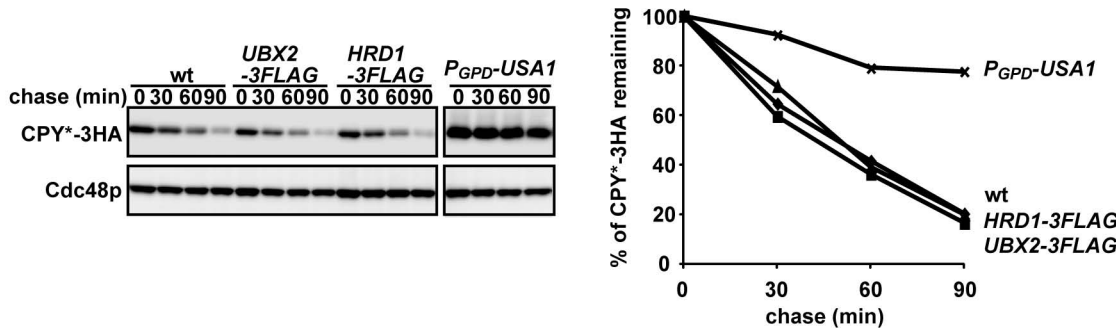

### Figure. S2. Triply FLAG tagged forms of Ubx2p and Hrd1p are functional

Yeast strains KNY140 (wt), KNY218 (*UBX2-3FLAG*), KNY220 (*HRD1-3FLAG*), and KNY269 (*P<sub>GPD-USA1</sub>*) expressing CPY\*-3HA were treated with cycloheximide and collected at the indicated time points. Total cell lysates were prepared and the degradation of CPY\* was analyzed by western blot analysis. The Cdc48p blot served as a loading control. Overexpression of Usa1p was previously shown to stabilize CPY\* (Carvalho *et al.*, 2010) and was used as a positive control. The results were quantified and are shown in the accompanying graph. The signal at the 0 time point was set to 100%.

# Figure. S3

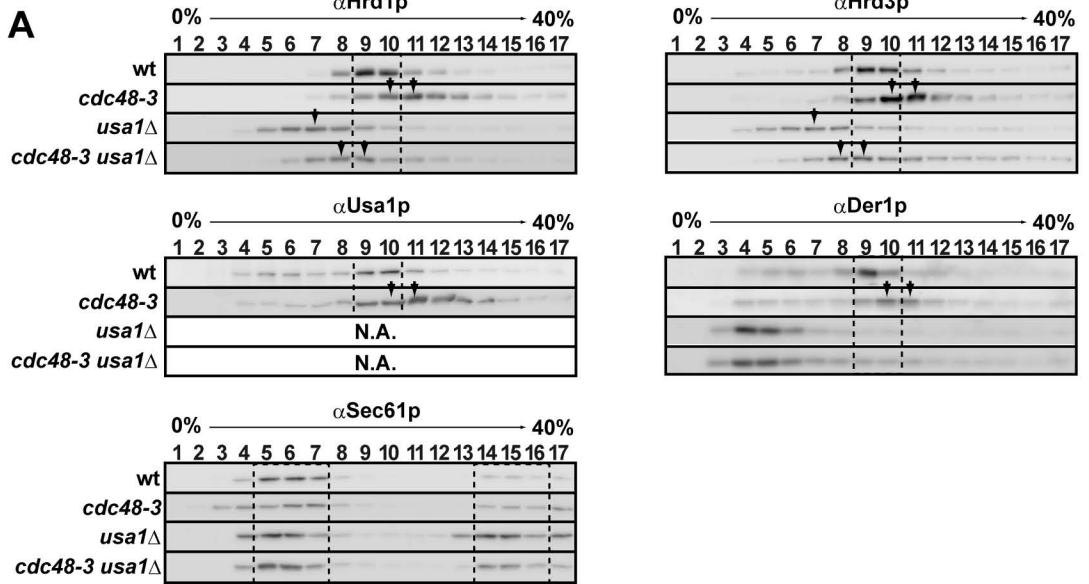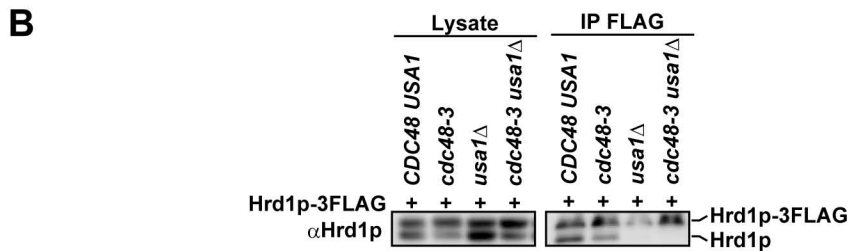

## Figure. S3 Analysis of the Hrd1 complex in *cdc48-3usa1* $\Delta$ cells

(A) Digitonin-solubilized membrane fractions were prepared from the indicated cells and subjected to sucrose density gradient analysis as in Fig. 1. The Hrd1p and Hrd3p peaks in *cdc48-3usa1* $\Delta$  cells shifted to more dense/heavier molecular weight fractions (#8-9) than those for *usa1* $\Delta$  cells (#7), suggesting the Usa1p-independent remodeling of Hrd1p-Hrd3p interaction in *cdc48-3* cells.

(B) Inactivation of Cdc48p does not facilitate the oligomeric formation of Hrd1p in *usa1* $\Delta$  cells. Digitonin-solubilized membrane fractions were prepared from the indicated wild type and mutant cells expressing 3xFLAG-tagged Hrd1 from a chromosome-integrated and non-tagged form of Hrd1p in a low copy number plasmid. Hrd1p-3FLAG was immunoprecipitated with anti-FLAG antibody and blotted with anti-Hrd1 antibody after SDS-PAGE.

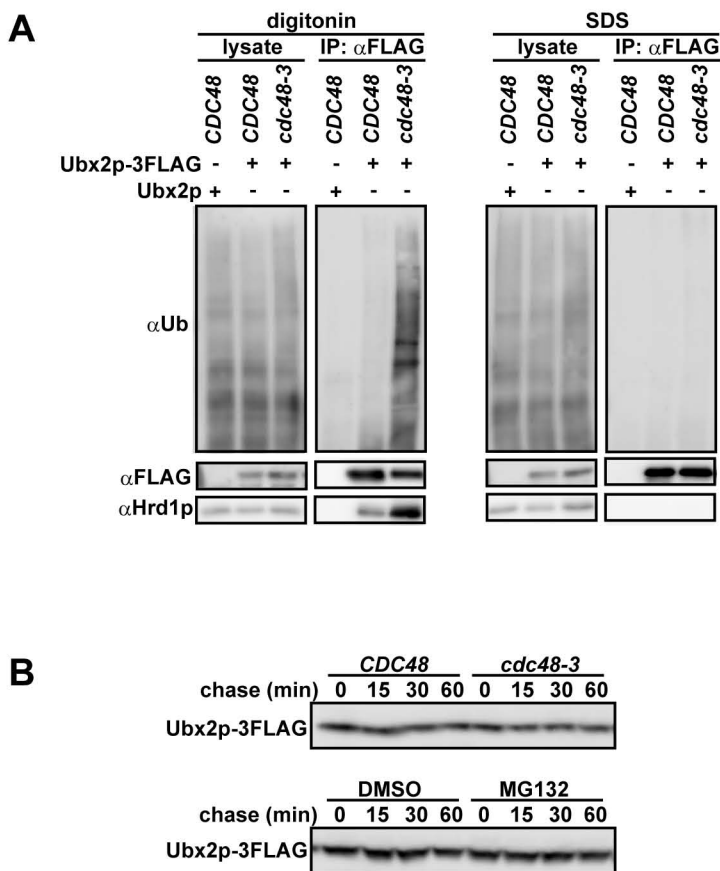

**Figure. S4 Ubx2p is not ubiquitinated and is stable**

(a) Wild type or *cdc48-3* cells expressing Ubx2p-3FLAG from a chromosome-integrated gene were disrupted with glass beads and membrane fractions were prepared. Membranes were solubilized in 1% digitonin or 1.8% SDS before Ubx2p-3FLAG was immunoprecipitated. The concentration of SDS was lowered to 0.18% with 0.6% TritonX-100 before immunoprecipitation. Proteins in the precipitated complex was separated by SDS-PAGE. Ubiquitinated species and Hrd1p bound to Ubx2p-3FLAG were detected by western blotting.

(b) Cells expressing Ubx2p-3FLAG as above were treated with cycloheximide (200  $\mu$ g/ml) and aliquots were removed at the indicated times. Ubx2p-3FLAG was detected with anti-FLAG antibody. *CDC48* (KNY218) and *cdc48-3* cells (KNY219) were grown at 25°C and shifted to 37°C for 1 hr. MG132 (100  $\mu$ M) was added to wild type cells (KNY218) 1 hr before the chase started.

# Figure. S5

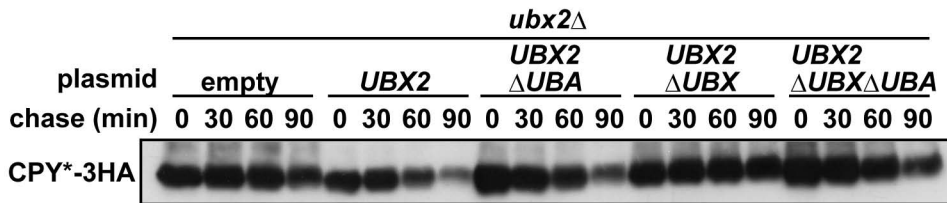

**Figure. S5** The degradation of CPY\*, a typical model ERAD substrate, is not slowed even when the *UBA* domain is deleted from Ubx2p.

Cycloheximide chase experiment was performed for *ubx2* $\Delta$  strain (KNY186) expressing CPY\*-3HA and *UBX2* or the indicated mutants lacking either the *UBA* and/or *UBX* domain(s) from low copy plasmids. Samples were taken at the indicated times and the degradation of CPY\* was analyzed by western blot analysis with anti-HA antibody.

**Figure. S6**

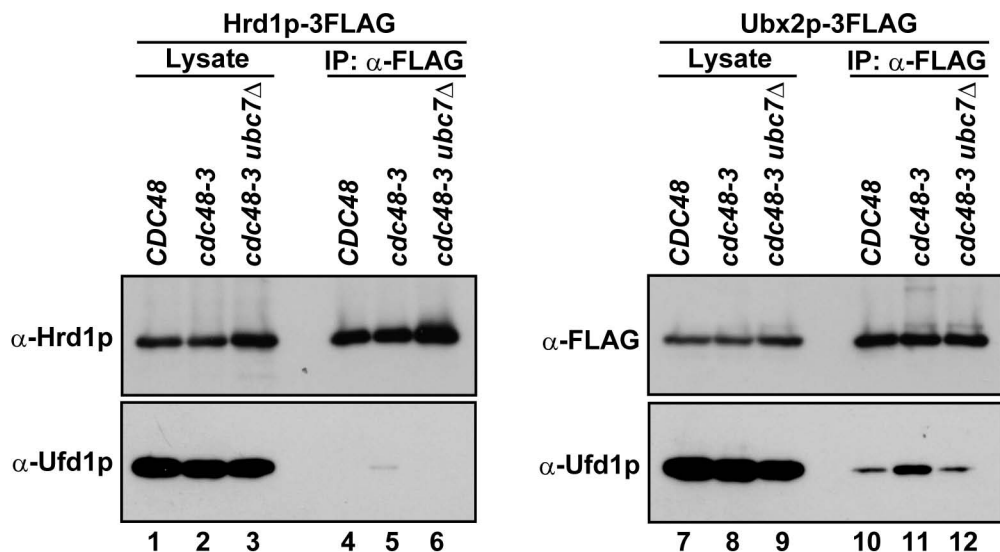

**Figure. S6 Increased amount of Ufd1p is co-immunoprecipitated with Hrd1p or Ubx2p from *cdc48-3* cells.**

The indicated wild-type or mutant cells expressing triply-FLAG tagged Hrd1p or Ubx2p were immunoprecipitated from TritonX-100 solubilized lysate. The immunoprecipitates were separated by SDS-PAGE and analyzed with anti-Ufd1p antibody. More Ufd1p was precipitated with Hrd1p or Ubx2p when *cdc48* was mutated (lanes 5 and 11) in Ubc7-dependent manner (lanes 6 and 12).

**Table S1: Strains used in this study**

|         |                                                                                                                |            |
|---------|----------------------------------------------------------------------------------------------------------------|------------|
| KNY140  | W303-1a, <i>pdr5Δ::HPH</i> , <i>pep4::LEU2</i>                                                                 | This study |
| KNY169  | KNY140, <i>hrd3Δ::CgHIS</i>                                                                                    | This study |
| KNY170  | KNY140, <i>usa1Δ::CgHIS</i>                                                                                    | This study |
| KNY186  | KNY140, <i>ubx2Δ::CgHIS</i>                                                                                    | This study |
| KNY208  | KNY140, <i>cdc48-3</i>                                                                                         | This study |
| KNY218  | KNY140, <i>UBX2-3FLAG-KanMX</i>                                                                                | This study |
| KNY219  | KNY140, <i>UBX2-3FLAG-KanMX</i> , <i>cdc48-3</i>                                                               | This study |
| KNY220  | KNY140, <i>HRD1-3FLAG-KanMX</i>                                                                                | This study |
| KNY222  | KNY140, <i>HRD1-3FLAG-KanMX</i> , <i>cdc48-3</i>                                                               | This study |
| KNY232  | KNY140, <i>UBX2-3FLAG-KanMX</i> , <i>ubc7Δ::CgTRP</i>                                                          | This study |
| KNY233  | KNY140, <i>UBX2-3FLAG-KanMX</i> , <i>ubc7Δ::CgTRP</i> , <i>cdc48-3</i>                                         | This study |
| KNY236  | KNY140, <i>HRD1-3FLAG-KanMX</i> , <i>ubc7Δ::CgTRP</i>                                                          | This study |
| KNY238  | KNY140, <i>HRD1-3FLAG-KanMX</i> , <i>ubc7Δ::CgTRP</i> , <i>cdc48-3</i>                                         | This study |
| KNY254  | KNY140, <i>HRD1-3FLAG-KanMX</i> , <i>usa1Δ::CgHIS</i>                                                          | This study |
| KNY255  | KNY140, <i>HRD1-3FLAG-KanMX</i> , <i>usa1Δ::CgHIS</i> , <i>cdc48-3</i>                                         | This study |
| KNY262  | KNY140, <i>hac1Δ::CgHIS</i>                                                                                    | This study |
| KNY269  | KNY140, <i>HIS3MX6-P<sub>GPD</sub>-USA1</i>                                                                    | This study |
| KNY279  | KNY140, <i>RPT5-3FLAG-KanMX</i>                                                                                | This study |
| KNY280  | KNY140, <i>RPT5-3FLAG-KanMX</i> , <i>cdc48-3</i>                                                               | This study |
| KNY282  | KNY140, <i>RPT5-3FLAG-KanMX</i> , <i>cdc48-3</i> , <i>usa1Δ::CgTRP</i>                                         | This study |
| KNY288  | KNY140, <i>RPT5-3FLAG-KanMX</i> , <i>cdc48-3</i> , <i>ubc7Δ::CgHIS</i>                                         | This study |
| KNY292  | KNY140, <i>usa1Δ::CgHIS</i> , <i>yos9Δ::CgTRP</i>                                                              | This study |
| KNY293  | KNY140, <i>usa1Δ::CgHIS</i> , <i>hrd3Δ::CgTRP</i>                                                              | This study |
| KNY294  | KNY140, <i>UBX2-3FLAG-KanMX</i> , <i>DOA10-13myc-HIS3MX6</i> , <i>cdc48-3</i> , <i>usa1Δ::CgTRP</i>            | This study |
| W303-1a | <i>MATa can1-100</i> , <i>leu2-3,-112</i> , <i>his3-11,-15</i> , <i>trp1-1</i> , <i>ura3-1</i> , <i>ade2-1</i> | Lab stock  |

**Table S2: Plasmids used in this study**

| Name              | Description                                                                                                     |                                                    |
|-------------------|-----------------------------------------------------------------------------------------------------------------|----------------------------------------------------|
| pFA6a-3FLAG-KanMX | Tagging at the C-terminus of an endogenous gene                                                                 | Y. Tamura, and H. Sesaki, Johns Hopkins University |
| pUC18-CgTRP1      | Gene deletion cassette                                                                                          | NBRP of the MEXT, Japan                            |
| pUC19-CgHIS3      | Gene deletion cassette                                                                                          | NBRP of the MEXT, Japan                            |
| pKN41             | <i>HIS3MX6-P<sub>GPD</sub></i> cassette                                                                         | This study                                         |
| pKN72             | <i>CEN/ARS, TRP1, P<sub>UBX2</sub>-UBX2-3FLAG</i>                                                               | This study                                         |
| pKN73             | <i>CEN/ARS, TRP1, P<sub>UBX2</sub>-UBX2 (UBAΔ)-3FLAG</i> (lacking 9-61 a.a. of Ubx2p)                           | This study                                         |
| pKN75             | <i>CEN/ARS, TRP1, P<sub>UBX2</sub>-UBX2 (UBAΔUBXΔ)-3FLAG</i> (lacking both 9-61 a.a. and 421-584 a.a. of Ubx2p) | This study                                         |
| pKN81             | <i>CEN/ARS, TRP1, P<sub>UBX2</sub>-UBX2 (UBXΔ)-3FLAG</i> (lacking 418-584 a.a. of Ubx2p)                        | This study                                         |
| pKN107            | <i>CEN/ARS, URA3, P<sub>GALI</sub>-HAC1(i)-T<sub>CYC1</sub></i>                                                 | This study                                         |
| 12-22             | <i>CEN/ARS, URA3, CPY*-3HA</i>                                                                                  | J. Weissman, UCSF                                  |
